# Supplementary material for: Normalidad y excepción
Source: Royal Society of Chemistry journal article supplement (doi:10.1039/c4an00201f), 2004-01-01

## Electronic Supplementary Information for Analyst

### **Cotton Fabric-based Electrochemical Device for Lactate Measurement in Saliva**

*Radha S.P. Malon,<sup>a</sup> K.Y. Chua,<sup>a</sup> Dedy H.B. Wicaksono<sup>a,b</sup> and Emma P. Córcoles<sup>a\*</sup>*

<sup>a</sup> Faculty of Biosciences and Medical Engineering (FBME), Universiti Teknologi Malaysia (UTM), 81310 Skudai, Johor, Malaysia.

<sup>b</sup> Medical Implant Technology Group (MediTeg), Materials and Manufacturing Research Alliance (MM-RA), Universiti Teknologi Malaysia (UTM), 81310 Skudai, Johor, Malaysia.

\* Corresponding author; Email: [emmacorcoles@gmail.com](mailto:emmacorcoles@gmail.com), [emma@biomedical.utm.my](mailto:emma@biomedical.utm.my)

### **Supplementary Figures**

**Figure S1** CV of the C-PB electrodes on the FED as obtained in 0.1 M PBS at potential scan rates ranging from 10 to 100 mV/s. *Inset* shows the dependence of anodic and cathodic peak currents on the square root of the potential scan rate.

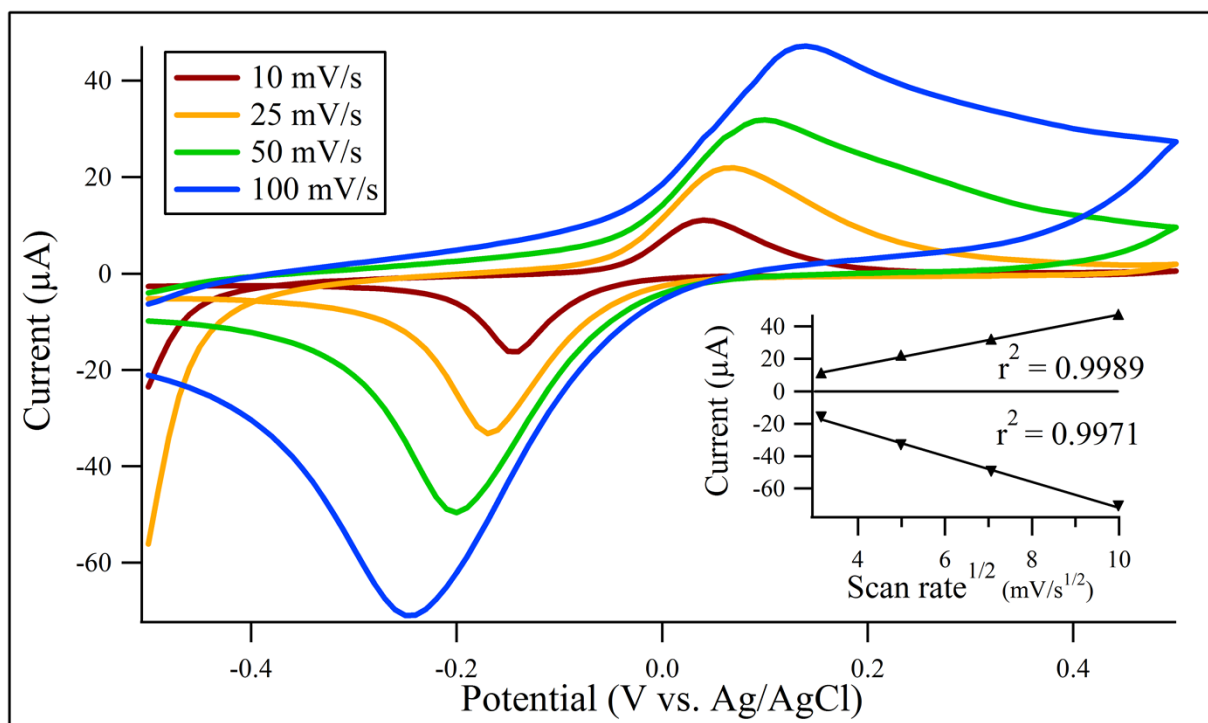

**Figure S2** Chronoamperometric response to demonstrate selectivity of the lactate FED towards 0.5 mM lactate in the presence of 0.5 mM glucose, ascorbic acid and uric acid, respectively. *Inset* shows the mean anodic current obtained for the respective sample solutions for three separate lactate FEDs. Error bars =  $\pm$  SEM ( $n = 3$ ).

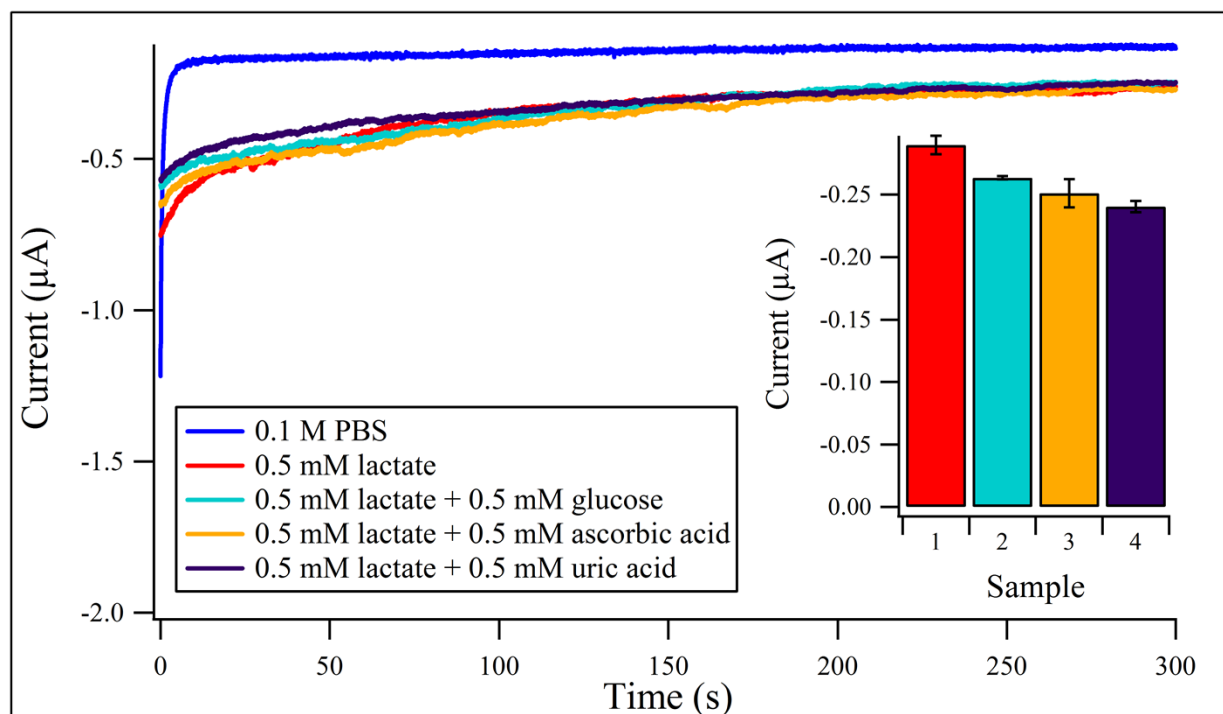

Supplement: c4an00201f1.pdf [file c4an00201f1.pdf]
